# Supplementary material for: Incorporation of Fly Ash in Flame-Retardant Systems of Biopolyesters
Source: MDPI journal article supplement (doi:10.3390/polym15132771), 2023-06-21
Supplement: s1 [file s1]

Supplementary

# Incorporation of Fly Ash in Flame-Retardant Systems of Biopolyesters

Marcos Batistella <sup>1,\*</sup>, Jean-Claude Roux <sup>1</sup>, Nour-Alhoda Masarra <sup>1</sup>, Gwenn le Saout <sup>2</sup>, Constantinos Xenopoulos <sup>3</sup> and José-Marie Lopez-Cuesta <sup>1</sup>

<sup>1</sup> Polymers Composites and Hybrids, IMT Mines Alès, 30319 Ales, France;

jean-claude.roux@mines-ales.fr (J.-C.R.); nour-alhoda.masarra@mines-ales.fr (N.-A.M.);

jose-marie.lopez-cuesta@mines-ales.fr (J.-M.L.-C.)

<sup>2</sup> LMGC, IMT Mines Ales, Université Montpellier, CNRS, 30100 Ales, France; gwenn.le-saout@mines-ales.fr

<sup>3</sup> Holcim Innovation Center, 38090 Saint Quentin Fallavier, France; constantinos.xenopoulos@holcim.com

\* Correspondence: marcos.batistella@mines-ales.fr; Tel.: +33-46-6785-342

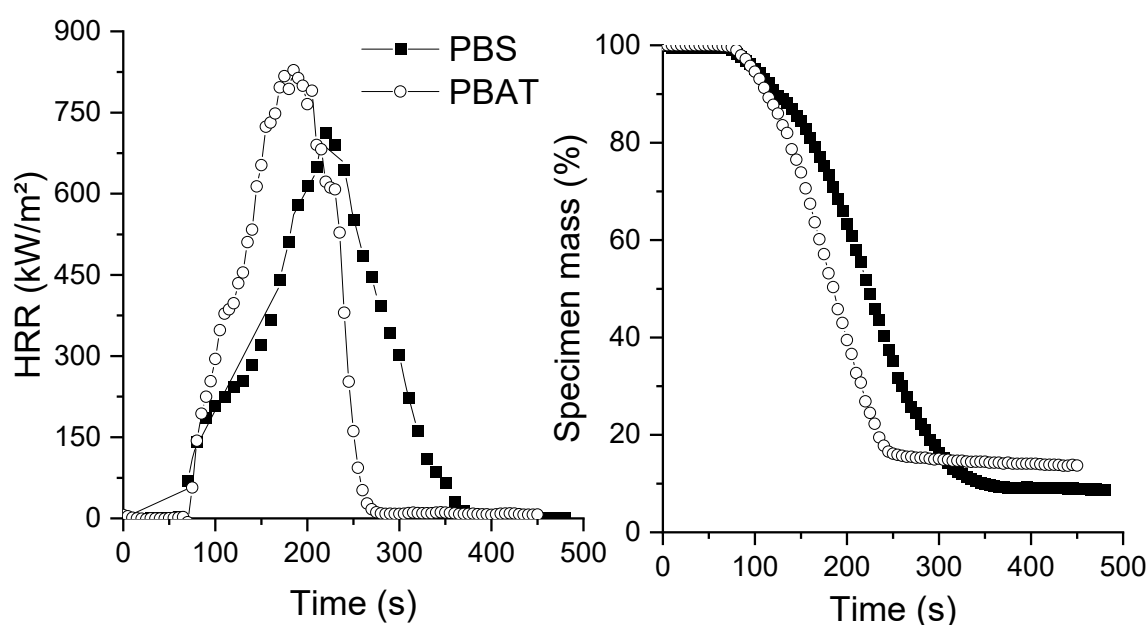

**Figure S1.** HRR and mass loss curves of PBS and PBAT.

**Table S1.** Tensile properties of some PBAT/PBS compositions. \*Data from technical datasheet.

| Formulation | E (MPa) | E (%)   | UTS (MPa) |
|-------------|---------|---------|-----------|
| PBS         | 741±17  | 20±1.5  | 37±0.7    |
| PBS-9       | 1175±24 | 20±5    | 24±0.2    |
| PBAT*       |         | 560/710 | 35/45     |
| PBAT-9      | 150±12  | 630±17  | 12±0.15   |
